# Supplementary material for: DIP/Dpr interactions and the evolutionary design of specificity in protein families
Source: PubMed Central journal article supplement (PMC7195491; doi:10.1038/s41467-020-15981-8), 2020-05-01
Supplement: 41467_2020_15981_MOESM3_ESM.pdf [file 41467_2020_15981_MOESM3_ESM.pdf]

## Description of Additional Supplementary Files

File Name: Supplementary Data 1

Description: FoldX effects for 3044 mutations of 33 interfacial residues of 13 template complexes on the DIP and Dpr side into residues occurring in DIPs and Dprs of other subfamilies. All  $\Delta\Delta G$  binding energy differences are in kcal mol<sup>-1</sup>. Negative constraints for 42 combinations of non-interacting DIP and Dpr subgroups that passed both energy and evolutionary filters are highlighted in grey. All other notations as in Fig. 3A.
